# Supplementary material for: Protein synthesis inhibitors stimulate MondoA transcriptional activity by driving an accumulation of glucose 6-phosphate
Source: PubMed Central journal article supplement (PMC7718662; doi:10.1186/s40170-020-00233-6), 2020-12-04
Supplement: 40170_2020_233_MOESM2_ESM.pdf [file 40170_2020_233_MOESM2_ESM.pdf]

|                     | CHX 1       | CHX 2      | CHX 3      | CHX 4      |
|---------------------|-------------|------------|------------|------------|
| lactic acid         | 116.4421455 | 122.764541 | 135.746381 | 140.461227 |
| pyruvic acid        | 52.79535178 | 63.4095206 | 61.8444506 | 45.4579777 |
| glycerol            | 3286.177048 | 3066.10822 | 3276.38016 | 2390.14977 |
| glyceric acid       | 1.963921474 | 1.80608682 | 1.67637229 | 1.95621808 |
| citric acid         | 170.2571405 | 173.569202 | 214.016473 | 178.998425 |
| aconitate           | 0.988610584 | 1.23309464 | 1.12888993 | 1.20214519 |
| isocitric acid      | 4.68814212  | 4.95560798 | 4.80801823 | 4.23234586 |
| 2-ketoglutaric acid | 0           | 0          | 0          | 0          |
| succinic acid       | 16.23449309 | 19.5620689 | 21.3038492 | 21.3693726 |
| fumaric acid        | 36.73818794 | 44.2597738 | 46.771138  | 45.0367301 |
| malic acid          | 51.64936148 | 60.9965654 | 64.3303481 | 61.8071522 |
| 2-hydroxyglutarate  | 0.149621557 | 0.13066544 | 0          | 0.25334465 |
| 2-aminoadipic acid  | 2.616714786 | 3.75542167 | 4.80216906 | 4.99635384 |
| lysine              | 38.1900712  | 44.0758743 | 52.0634675 | 45.2890813 |
| valine              | 931.42855   | 1149.17355 | 1354.35791 | 1263.08203 |
| leucine             | 833.8464788 | 916.114792 | 1214.048   | 1094.66745 |
| isoleucine          | 611.7183153 | 644.818484 | 846.935337 | 819.814335 |
| threonine           | 37.51954496 | 50.0448654 | 52.0892039 | 50.1304478 |
| homoserine          | 9.038250352 | 10.1619    | 9.36218247 | 10.6563713 |
| glycine             | 33.67704172 | 36.6134255 | 45.6867017 | 41.95288   |
| serine              | 143.0404251 | 170.90653  | 154.675467 | 131.672651 |
| alanine             | 4.152829438 | 6.10933547 | 5.54969307 | 6.04947276 |
| glutamic acid       | 207.5738651 | 292.183421 | 373.477732 | 382.485839 |
| glutamine           | 101.0410999 | 121.385295 | 176.320908 | 161.095403 |
| proline             | 797.1825475 | 856.763643 | 964.240453 | 1000.93489 |
| aspartic acid       | 1007.674587 | 1168.20328 | 1227.20045 | 1021.11305 |
| asparagine          | 0.919895499 | 1.11597969 | 1.45059431 | 1.39985336 |
| methionine          | 106.3432446 | 128.916464 | 142.827387 | 121.904476 |
| cysteine            | 102.0086527 | 128.134407 | 134.610473 | 129.947921 |
| homocysteine        | 0.708208703 | 0.89239659 | 1.41432945 | 1.34918443 |
| phenylalanine       | 206.0887326 | 255.641619 | 331.472498 | 314.315265 |
| tyrosine            | 35.06685973 | 47.7199883 | 60.7366177 | 60.5245329 |
| tryptophan          | 102.3721776 | 129.500103 | 158.849436 | 160.408889 |
| histidine           | 6.953523324 | 9.29660443 | 5.10398627 | 0.32984479 |
| 4-hydroxyproline?   | 7.547576321 | 8.27838185 | 11.5813578 | 10.3175849 |
| ornithine           | 72.56313023 | 80.2034179 | 67.4046722 | 63.5388374 |
| phosphate           | 31885.92095 | 29390.3075 | 32241.6473 | 28453.033  |
| diphosphate         | 348.842106  | 328.340969 | 483.845732 | 436.8536   |
| 1-phosphoglycerol   | 116.2714661 | 149.933275 | 254.653001 | 250.336303 |
| 3-phosphoglycerate  | 108.670691  | 114.098034 | 112.27366  | 111.396138 |
| 2-phosphoglycerate  | 6.177707843 | 5.1017597  | 6.57914709 | 6.14783009 |
| DHAP                | 0.364633276 | 0.59138212 | 0.59544557 | 0          |
| phosphoenolpyruvate | 5.763200715 | 3.95383957 | 3.77505471 | 4.79566514 |

|                           |             |            |            |            |
|---------------------------|-------------|------------|------------|------------|
| fructose                  | 1.162614913 | 1.32407651 | 1.60618225 | 1.45847036 |
| ribose                    | 7.933267445 | 7.04141564 | 4.8513021  | 4.34163179 |
| galactose or isomer       | 0.981960737 | 1.19437896 | 1.12538042 | 0.93687844 |
| glucose                   | 13.34291796 | 15.2646276 | 75.2355418 | 16.7217402 |
| glucose-6-phosphate       | 35.95239769 | 38.3527278 | 34.1954212 | 30.7351764 |
| mannitol                  | 0.509821602 | 0.87110297 | 1.24002417 | 1.28162586 |
| sorbitol                  | 3.624166603 | 5.69314183 | 7.41206899 | 5.28844531 |
| inositol                  | 264.5541873 | 318.76174  | 473.517266 | 434.402614 |
| myo-inositol phosphate    | 11.40448757 | 20.5057638 | 15.155201  | 11.6667694 |
| sedoheptulose             | 1.674653131 | 2.5010334  | 2.34551741 | 2.24433552 |
| sedoheptulose-7-P         | 14.36256117 | 19.2717013 | 17.4831709 | 17.9457426 |
| myristic acid             | 16.02723953 | 15.0894391 | 15.1645597 | 12.7715507 |
| palmitiladic acid         | 2.843917891 | 2.47296453 | 2.57363506 | 2.44403071 |
| palmitic acid             | 745.7282482 | 709.527884 | 922.15684  | 721.269229 |
| linoleic acid             | 0.997477047 | 1.12081915 | 1.30202538 | 1.17233993 |
| oleic acid                | 40.35459639 | 37.3045006 | 38.1155353 | 40.3781691 |
| elaidic acid              | 11.56186728 | 13.0588013 | 12.7149271 | 13.456078  |
| stearic acid              | 340.0532249 | 331.298848 | 450.275002 | 345.761793 |
| 1-monooleoylglycerol      | 3.557668134 | 3.25405352 | 3.85109392 | 2.77983656 |
| 1-monostearyl glycerol    | 5.572571768 | 6.02803252 | 6.00124904 | 7.4582677  |
| 1-monopalmitoylglycerol   | 26.94739657 | 30.6512097 | 31.8323562 | 28.2851847 |
| 2-monostearyl glycerol    | 2.595656937 | 2.23099148 | 2.26245919 | 2.47582298 |
| cholesterol               | 715.1034862 | 672.335659 | 960.360113 | 929.819561 |
| xanthine                  | 26.12170724 | 27.3884451 | 25.9083163 | 34.6297294 |
| hypoxanthine              | 206.7193598 | 232.484799 | 189.98691  | 205.81421  |
| adenosine                 | 31.83392579 | 36.599875  | 26.7342192 | 27.8122747 |
| adenine                   | 116.3302064 | 129.600763 | 113.993316 | 150.67648  |
| uracil                    | 26.02417615 | 31.7313774 | 24.2272646 | 32.0485946 |
| adenosine-5'-monophospha  | 132.0648527 | 187.279394 | 201.964842 | 196.703738 |
| ribose(xyl)-5-phosphate   | 17.60214495 | 25.9017627 | 23.9441648 | 16.2150509 |
| phosphoethanolamine       | 10.72176995 | 16.9613426 | 21.0675427 | 20.5825139 |
| 4-aminobutyrate           | 7.547576321 | 8.27838185 | 11.5813578 | 10.3175849 |
| B-alanine                 | 43.48999924 | 61.5269704 | 73.7545318 | 72.4684911 |
| pantothenic acid          | 10.10444248 | 14.0441156 | 19.5502678 | 18.7981728 |
| creatinine                | 12.57486064 | 12.9736268 | 16.791799  | 16.4395838 |
| 3-hydroxybutyrate         | 0.502063447 | 0.71333654 | 0.63054059 | 0.71830659 |
| N-methylalanine           | 10.38041113 | 10.4987265 | 11.1485192 | 11.5137691 |
| sn-glycero-3-phosphoethan | 1.569363887 | 1.93481648 | 1.71146732 | 1.90654266 |
| nicotinic acid            | 55.56279643 | 59.1798318 | 51.4422856 | 52.3340495 |
| 1-methylnicotinamide      | 35.25748868 | 40.3911087 | 39.1859335 | 36.6763568 |
| cytosine                  | 4.385574082 | 6.33388645 | 4.06166407 | 5.44144561 |

| CHX 5      | CHX 6      | DMSO 1     | DMSO 2     | DMSO 3     | DMSO 4     | DMSO 5     |
|------------|------------|------------|------------|------------|------------|------------|
| 147.929518 | 116.10042  | 71.5953453 | 69.2957727 | 72.203743  | 75.1761166 | 92.2003957 |
| 66.2854254 | 3.89059838 | 48.8728557 | 39.0247271 | 53.8758806 | 50.6580908 | 51.5939123 |
| 3704.17216 | 1843.9029  | 3259.26081 | 2251.00142 | 3096.56294 | 1750.53235 | 3820.22633 |
| 1.5645384  | 2.7063732  | 1.36230145 | 1.29558367 | 1.41884869 | 1.57010789 | 1.5595411  |
| 218.463319 | 121.128143 | 203.219281 | 259.27104  | 194.748553 | 324.600941 | 332.95659  |
| 1.84712022 | 1.03694465 | 0          | 1.03064409 | 1.56654287 | 2.38802456 | 2.05810519 |
| 6.90602411 | 3.10261016 | 4.57593565 | 4.29920275 | 3.74158573 | 7.09185682 | 7.83846005 |
| 0          | 0          | 0          | 0          | 0.72665533 | 0          | 0.6642993  |
| 28.0679567 | 23.2531286 | 44.9233458 | 44.6855058 | 39.9778589 | 44.211317  | 49.9678055 |
| 49.792296  | 29.1488355 | 61.6365724 | 73.5775069 | 79.1847542 | 75.0454771 | 73.1503567 |
| 71.020394  | 45.4379127 | 117.42107  | 121.607268 | 135.593098 | 131.339728 | 137.840067 |
| 0.21503788 | 0.22802316 | 0.57752267 | 0.61236951 | 0.8103487  | 0.73677414 | 0.64528051 |
| 5.4820874  | 2.88505364 | 7.21321153 | 8.37131443 | 7.93117712 | 8.08828705 | 7.01385948 |
| 62.5222626 | 34.4726155 | 107.124633 | 106.347525 | 119.856776 | 110.521801 | 102.44745  |
| 2130.43262 | 1262.93204 | 4580.09474 | 3133.4123  | 3229.61668 | 3049.25501 | 3172.36471 |
| 2005.55213 | 1218.1326  | 4475.89032 | 2757.77941 | 2941.24873 | 2804.4261  | 2950.62187 |
| 1399.51337 | 825.519335 | 3044.53882 | 1996.33722 | 2141.53007 | 1964.8963  | 2093.68936 |
| 93.4380926 | 45.913397  | 201.802255 | 151.350376 | 157.798424 | 126.782764 | 135.282039 |
| 12.4680615 | 10.6782123 | 9.16118618 | 7.61434419 | 8.30238181 | 7.63470033 | 8.43483508 |
| 59.5337875 | 30.9662922 | 131.845165 | 113.443636 | 112.558714 | 101.656169 | 104.822082 |
| 288.350629 | 101.817946 | 402.691652 | 228.139183 | 287.661973 | 235.881325 | 306.269147 |
| 8.1424919  | 5.48975094 | 19.9780926 | 15.2218951 | 16.1341115 | 1.64313616 | 15.8086932 |
| 473.30388  | 202.113745 | 800.971543 | 806.034523 | 816.729087 | 708.989318 | 707.128266 |
| 202.969565 | 231.285756 | 493.579281 | 389.989125 | 403.960303 | 461.852713 | 372.182853 |
| 1571.68703 | 815.519211 | 2915.71633 | 1794.21064 | 1912.04188 | 1974.54658 | 1749.49538 |
| 1422.00274 | 524.102627 | 1745.00104 | 1774.02574 | 2051.01422 | 1858.98827 | 2048.0592  |
| 1.7919823  | 1.23057743 | 3.92040085 | 4.91739511 | 4.37962456 | 4.13177745 | 2.98595064 |
| 228.044911 | 73.7718458 | 481.299939 | 377.493293 | 424.533117 | 355.534906 | 394.260956 |
| 125.145152 | 17.3731217 | 157.839506 | 353.42358  | 200.791214 | 314.593633 | 141.052885 |
| 1.31366087 | 1.24029645 | 2.19249029 | 2.71441763 | 2.03916422 | 2.01476894 | 1.19818401 |
| 514.083883 | 254.005834 | 1015.87751 | 806.125748 | 849.865752 | 682.081644 | 795.7966   |
| 91.5509974 | 68.2514426 | 181.797382 | 172.224315 | 160.876371 | 152.952851 | 136.497884 |
| 229.034637 | 134.242839 | 508.080224 | 469.514671 | 475.351728 | 429.891483 | 391.417646 |
| 9.65602772 | 3.83153664 | 36.3292031 | 29.3355081 | 16.180389  | 28.6498033 | 10.612487  |
| 11.8436246 | 7.91053448 | 23.3302856 | 20.623557  | 21.9473542 | 20.1558036 | 16.1225033 |
| 72.9364366 | 33.7728461 | 68.3584239 | 62.3432922 | 76.3559185 | 72.4643334 | 77.6184148 |
| 36150.1759 | 19170.6103 | 34776.722  | 30218.2955 | 30727.4193 | 28953.5774 | 39528.5919 |
| 498.683863 | 227.226197 | 383.109442 | 314.833626 | 300.372533 | 277.584526 | 360.58003  |
| 204.725707 | 166.735018 | 32.3296257 | 55.9595099 | 42.4187513 | 52.7369623 | 30.2045616 |
| 77.9002276 | 89.8478521 | 38.9932593 | 38.1532408 | 60.9868628 | 58.7220351 | 42.3874576 |
| 4.32419114 | 5.71553125 | 1.60448838 | 2.01567587 | 3.03462295 | 2.60305225 | 2.13961431 |
| 0.52794556 | 0.01869042 | 0          | 0          | 0.01181553 | 0.04138269 | 0          |
| 2.20965202 | 1.75465688 | 1.34483605 | 1.98170926 | 3.10650078 | 2.16893974 | 1.53101291 |

|            |            |            |            |            |            |            |
|------------|------------|------------|------------|------------|------------|------------|
| 1.54661857 | 1.12890153 | 2.06441066 | 2.58049212 | 3.70023136 | 1.71941014 | 1.59893717 |
| 4.30351442 | 6.14615858 | 22.552493  | 12.9325453 | 32.5596729 | 25.7416551 | 23.9826991 |
| 0.60789554 | 1.27543444 | 0.89073556 | 1.05781738 | 1.48186488 | 1.28367477 | 1.20361796 |
| 9.91104058 | 14.6615151 | 3.41623287 | 3.36754707 | 7.17498295 | 4.03765212 | 7.92812008 |
| 22.0055427 | 19.4208444 | 0.6671784  | 1.18786099 | 1.27213915 | 2.13161417 | 1.48346592 |
| 0.90977563 | 0.44857014 | 2.20064081 | 2.18356799 | 1.91017798 | 2.5884466  | 2.13282188 |
| 4.72531949 | 3.86667464 | 9.8423369  | 11.6563712 | 7.04698134 | 11.9612198 | 13.4557967 |
| 544.151968 | 316.478946 | 525.642269 | 557.923942 | 540.053592 | 507.668218 | 475.937166 |
| 11.5376091 | 8.10042918 | 9.75966733 | 7.49594628 | 8.75924912 | 11.6593696 | 13.980172  |
| 1.25576606 | 1.24777262 | 1.08401936 | 0.74338359 | 2.17504286 | 1.40701141 | 1.46988107 |
| 11.964928  | 11.5177861 | 27.084183  | 20.6429665 | 48.4771663 | 31.8573674 | 25.8506163 |
| 15.8287175 | 9.27867342 | 20.2901411 | 19.2348078 | 24.5910799 | 17.8635272 | 26.709179  |
| 2.69900104 | 2.28322203 | 3.52801145 | 3.17927499 | 4.62282763 | 3.16780424 | 3.32964741 |
| 720.123251 | 693.757836 | 645.104462 | 949.49397  | 725.975941 | 693.7045   | 730.740098 |
| 0.97594113 | 1.03245895 | 1.22956439 | 1.16748102 | 1.83239238 | 1.31207465 | 1.18459916 |
| 32.7657072 | 29.76861   | 40.7316491 | 37.7048815 | 58.4740926 | 37.078889  | 43.4294158 |
| 10.8056533 | 10.0741378 | 12.8894676 | 10.6082585 | 17.4732054 | 11.0540464 | 12.9898362 |
| 350.089933 | 323.836991 | 294.307181 | 477.110576 | 336.764378 | 323.156604 | 348.379474 |
| 3.12769834 | 2.21668413 | 4.0007417  | 2.82796316 | 3.89912618 | 3.00795346 | 4.31047378 |
| 6.10376741 | 4.80418624 | 5.63201036 | 5.80149753 | 7.15824428 | 5.85362187 | 6.12541011 |
| 28.4883833 | 21.0723301 | 32.5461967 | 24.2919512 | 32.3341931 | 27.2289976 | 31.9257625 |
| 0          | 1.64400958 | 2.83638148 | 1.41883395 | 3.6874312  | 3.06231895 | 1.58942777 |
| 775.611294 | 652.707687 | 377.258532 | 468.193855 | 464.450914 | 347.169111 | 420.361533 |
| 27.2160758 | 68.1916332 | 28.6153167 | 23.7591607 | 37.8431858 | 34.4368883 | 27.2743089 |
| 190.658646 | 280.274849 | 756.527913 | 648.756488 | 1244.95948 | 1104.87721 | 812.182649 |
| 25.9575529 | 33.1904525 | 109.518558 | 69.9654002 | 186.445186 | 147.520359 | 111.571037 |
| 140.416976 | 146.531418 | 97.082026  | 109.857732 | 116.060051 | 135.902372 | 118.093125 |
| 32.4652055 | 32.2185506 | 18.5063413 | 19.6841376 | 27.6709957 | 28.6311405 | 33.0682486 |
| 246.948946 | 127.624187 | 155.433938 | 186.656244 | 137.945374 | 165.86993  | 149.429305 |
| 20.6505284 | 4.24795926 | 18.5855178 | 10.8741686 | 22.7015791 | 20.6783615 | 22.9665521 |
| 16.9273405 | 19.9643619 | 15.0027814 | 14.2620956 | 13.9255913 | 16.3664476 | 11.3501445 |
| 11.8436246 | 7.91053448 | 23.3302856 | 20.623557  | 21.9473542 | 20.1558036 | 16.1225033 |
| 93.971552  | 65.6833785 | 245.209604 | 201.601554 | 199.727816 | 225.581092 | 168.943946 |
| 22.8381252 | 19.9658571 | 52.6139451 | 53.4479215 | 50.6207011 | 50.1939555 | 42.3983255 |
| 26.1022899 | 3.18709087 | 52.4066889 | 52.9985917 | 54.2923782 | 39.1131321 | 34.9171471 |
| 0.80087824 | 0.78499775 | 1.62078942 | 1.85651803 | 1.54881957 | 1.62366196 | 1.71440842 |
| 12.8622976 | 8.92505062 | 23.2825469 | 15.6605496 | 16.0317102 | 14.3468101 | 16.8248402 |
| 3.5522603  | 0.45006538 | 1.40421842 | 1.07722687 | 2.50981632 | 0.72054564 | 3.51983535 |
| 57.6563414 | 48.9681597 | 41.5897825 | 34.2655193 | 48.7459697 | 39.3338398 | 39.7628641 |
| 51.4078369 | 40.429627  | 29.8588534 | 23.4913097 | 34.855825  | 30.2523682 | 37.1206102 |
| 5.25877884 | 3.80013673 | 1.93400232 | 1.83031521 | 2.57874027 | 2.57221809 | 2.6938763  |

DMSO 6

84.2406176  
53.8882847  
2254.07063  
1.47893532  
262.73666  
1.12002649  
5.32108804  
0  
47.6598212  
81.6041291  
145.683308  
0.45705548  
7.93833206  
137.158982  
2906.62942  
2688.65149  
1909.70001  
110.748873  
7.64292988  
100.452135  
211.642668  
4.01054158  
784.724812  
371.165616  
1691.49402  
2033.53318  
4.05576602  
315.019958  
225.49193  
1.6482864  
620.368623  
133.71519  
348.768935  
29.7865463  
18.007986  
60.4766192  
32252.7475  
347.9828  
50.6504074  
50.2828386  
2.44500627  
0  
1.30284868

2.24390186  
27.6571489  
1.20277758  
18.714257  
2.21792187  
2.40555517  
16.2067063  
489.955779  
9.34702517  
2.40074406  
33.112948  
21.0717011  
3.21189726  
822.932726  
1.41735311  
40.2285802  
11.6361515  
382.275432  
2.75869067  
5.72810797  
29.7345863  
2.40459295  
350.890635  
29.9991974  
857.937402  
108.774394  
99.0097641  
22.6199164  
195.991164  
18.705597  
14.7604865  
18.007986  
155.613439  
45.8575793  
36.8810096  
1.77241305  
13.6914578  
2.02451523  
37.3351785  
35.0402788  
2.36610406
